## RESEARCH ARTICLE

# The importance of trust in the relation between COVID-19 information from social media and well-being among adolescents and young adults

Adam J. Hoffman<sup>1\*</sup>, Luke McGuire<sup>2</sup>, Channing J. Mathews<sup>3</sup>, Angelina Joy<sup>4</sup>, Fidelia Law<sup>2</sup>, Marc Drews<sup>5</sup>, Adam Rutland<sup>2</sup>, Adam Hartstone-Rose<sup>6</sup>, Mark Winterbottom<sup>7</sup>, Kelly Lynn Mulvey<sup>4</sup>

**1** Department of Psychology, Cornell University, Ithaca, New York, United States of America, **2** Department of Psychology, University of Exeter, Exeter, United Kingdom, **3** Department of Psychology, University of Virginia, Charlottesville, Virginia, United States of America, **4** Department of Psychology, North Carolina State University, Raleigh, North Carolina, United States of America, **5** EdVenture, Columbia, South Carolina, United States of America, **6** Department of Biological Sciences, North Carolina State University, Raleigh, North Carolina, United States of America, **7** Faculty of Education, University of Cambridge, Cambridge, United Kingdom

\* [ajh324@cornell.edu](mailto:ajh324@cornell.edu)

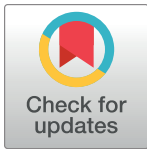

## OPEN ACCESS

**Citation:** Hoffman AJ, McGuire L, Mathews CJ, Joy A, Law F, Drews M, et al. (2023) The importance of trust in the relation between COVID-19 information from social media and well-being among adolescents and young adults. *PLoS ONE* 18(3): e0282076. <https://doi.org/10.1371/journal.pone.0282076>

**Editor:** Remya Lathabhavan, IIM Bodh Gaya: Indian Institute of Management Bodh Gaya, INDIA

**Received:** October 12, 2022

**Accepted:** February 8, 2023

**Published:** March 23, 2023

**Copyright:** © 2023 Hoffman et al. This is an open access article distributed under the terms of the [Creative Commons Attribution License](https://creativecommons.org/licenses/by/4.0/), which permits unrestricted use, distribution, and reproduction in any medium, provided the original author and source are credited.

**Data Availability Statement:** The datasets generated and/or analyzed during the current study are publicly available. We have uploaded our dataset to OSF. <https://osf.io/s9bcf/>.

**Funding:** This work was supported in the US by the National Science Foundation [grant number: DRL-1831593] awarded to KLM and AHR; and collaboratively in the UK by the Wellcome Trust [grant number: 206259/Z/17/Z] and the Economic and Social Research Council awarded to AR and

## Abstract

During the COVID-19 pandemic, young people have been exposed to distressing content about COVID-19 without knowing whether they can trust such content. This indicates a need to examine the effects of social media use on mental health and well-being. Existing research provides an inconsistent impression of such effects. Thus, we examined the relation between exposure to COVID-19 information on social media and well-being and assessed if trust in COVID-19 information on social media moderated this relationship. The sample consisted of 168 adolescents and young adults from the U.K. and U.S. ( $M_{\text{age}} = 17.4$  years). Participants completed measures of exposure to, and trust in, COVID-19 information on social media platforms, and measures of emotional, psychological, and social well-being. Results revealed a null to positive relation between exposure to COVID-19 information on social media and well-being across measures. However, when trust was added to the models as a moderator, results indicated that, for adolescents with higher levels of trust in COVID-19 information found on social media, the relation between information encountered on social media and well-being was positive. In contrast, for adolescents with lower levels of trust, the association between information encountered on social media and well-being was null or sometimes negative. Given the lack of consensus about the impact of social media use on well-being, these results point to the importance of trust when assessing the relationship between exposure to COVID-19 information and well-being.

## Introduction

During the COVID-19 pandemic, social media outlets were flooded with information and misinformation regarding the COVID-19 virus and the long-reaching negative effects of the virus

MW. The funders did not play any role in study design, data collection and analysis, decision to publish, or preparation of the manuscript.

**Competing interests:** The authors have declared that no competing interests exist.

on our everyday lives, social interactions, and general well-being [1, 2]. These continuous stories became inescapable to almost anyone consuming media. Indeed, terms like “doomscrolling” (continuous viewing of information that was emotionally and/or psychologically taxing) or “news avoidance” (purposefully avoiding stressful information) became colloquial and commonly discussed phenomena when considering the impact of continuous streaming of COVID-19 information on people’s mental health and well-being [3].

Unlike most other historical pandemics in the West, the COVID-19 virus spread across nations in a highly globalized world. This globalization allowed for information (both factual and counterfactual) to be easily accessed and spread through and across many types of media, with social media heightening concern internationally [4]. Some information about COVID-19 shared through social media was false and termed as “misinformation” [5]. The introduction of misinformation only exacerbated existing distrust of information viewed on social media platforms, especially among younger age demographics [6].

Adolescents and young adults consume social media more than any other media outlet [7, 8]. The effects of such use have been investigated and discussed extensively in popular media across prominent online and traditional media news (e.g., [9]). However, research to date has not fully examined the effects of social media use on adolescents and young adults during the global COVID-19 pandemic. Furthermore, given the decaying trust of information on social media [6], more attention is needed to understand how adolescent and young adult trust in social media could impact the role of social media in their lives. Thus, we investigated the relation between encountering COVID-19 information on social media platforms and the emotional, psychological, and social well-being of adolescents and young adults, whilst considering the role of trust as a potential moderator.

## Social media use and implications for well-being

In 2021, a record high number of 72% of adults engaged with at least one social media site, with younger adults being more likely than older adults to have a social media account across multiple platforms [8]. There are similar statistics in the UK, as 78% of adults engage in some form of social media use [10]. Not only are a vast majority of adults on social media, many are frequent users. For example, 49% of Facebook users and 30% of Twitter users report visiting these apps or sites multiple times each day [8]. In the UK, adults are spending an average of 16.6 hours on Facebook and 19.9 hours on TikTok each month [10]. Among American adolescents 97% report using at least one social media site and 95% report ownership or access to a smartphone or computer to view social media [11]. In the UK, 87% of adolescents report using at least one social media site and 91% report that they own or have access to a smartphone or computer to view social media [12].

Given the increase in social media usage, researchers have investigated its impact on the mental health and well-being of young people, and have found both positive *and* negative affect influences on well-being [13]. Among qualitative studies, research reveals that young people perceive social media as positive as it can foster social connections, make it easier to find news and information, and provide inspiration for exploration of their identities and affirm self-expression [11, 13]. Conversely, young people also perceive social media use to be negative detailing that it facilitates bullying and rumor spreading, envy or inferiority, spread of misinformation, and boredom/wasted time, all of which could lead to poorer mental health outcomes [13, 14].

Indeed, quantitative research corroborates these mixed effects of social media use. For example, one longitudinal study of adolescents aging into early adulthood revealed no significant association between social media use and anxiety or depression over the eight years of the

study [15]. However, among college-attending emerging adults, other researchers found a positive effect of social media use upon psychological well-being due to the positive effect of bonding and social capital [16]. Conversely, in a 5-year longitudinal study, greater use of social media earlier in adolescence was associated with greater decreases in well-being, compared to adolescents who engaged in less social media use [17]. Specific to the era of COVID-19, one study with very young American adults who have a history of adverse childhood experiences found a positive association between getting COVID-19 information via social media and elevated depression and PTSD symptoms [18]. In another study with a predominately Emirati adolescent and adult sample revealed that increased social media use during the COVID-19 pandemic was positively associated with poorer well-being [19]. Some studies suggest that social media use may be particularly detrimental for adolescent girls (e.g., [17]), while others have observed no effect of gender (e.g., [15]).

Well-being has become an increasingly significant outcome for clinical psychology research as there has been a renewed push through positive psychology to understand mental health beyond psychological dysfunction, and to also understand what factors facilitate and even promote psychological wellness [20]. It is important to note that well-being is theorized to be comprised of three dimensions or parts; emotional, psychological, and social well-being [21]. Emotional well-being is comprised of the judgment of life satisfaction and general positive affect. Psychological well-being captures positive functioning that assesses self-acceptance, personal growth and autonomy. Finally, social well-being captures well-being as it relates to social integration, acceptance, actualization, and coherence. The relation between social media use and social and emotional well-being may be particularly strong, compared the psychological well-being, as social media use is likely to have more direct impacts on social and emotional well-being given the highly social and affective nature of social media. Further, given the documented differential impact of social media on the social and emotional lives of individuals [22, 23], it is important to consider these dimensions independently as their relations may differ.

### Trust in social media

One critical factor that could explain inconsistencies in the findings above, and provide a better understanding of the role of social media use in the well-being of adolescents and young adults, is trust [24]. This factor could be particularly important when considering *information* or *news* that adolescents are consuming on social media. There is good reason to believe that young people may not trust information they are viewing on social media. The Edelman Trust Barometer Reports revealed that for years and across the globe, individuals' trust in many institutions across society has been waning (e.g., government, businesses, non-governmental organizations), with media representing the least trusted social institution [6]. Trust in media was further eroded during the COVID-19 pandemic with the spreading of misinformation on social media, in what the World Health Organization termed an "Infodemic" (a time of unprecedented and excessive amounts of misinformation that make it difficult to identify reliable sources of information) [25, 26]. In 2021, trust in information from the media was rated a record low, with social media representing the least trusted form [6]. Among adults across the globe, 44% report trusting news (overall), whereas only 26% believe the news they see on their social media [26].

Given the precipitous drops in trust, understanding trust may be a particularly important factor in understanding the complex relationship between encountering information on social media and well-being. Indeed, trust in social media has been shown to be an important moderator and mediator of the effects of social media on other outcomes. For example, research has revealed that the extent to which an individual trusts a social media platform can impact the

relationship between social media exposure and (mis)information building (e.g., believing in conspiracy theories) [27]. Specifically, for individuals who have greater trust in social media, there was a stronger positive association between social media exposure and belief in conspiracy theories and misinformation, compared to those who had less trust [27]. In a study examining more global, institutional trust (including media) during the early COVID-19 pandemic among adults, results indicated that greater trust was associated with more happiness, greater life satisfaction, and better mental health [28]. Other research has also found a positive association between trust in general media and positive well-being among adults during the COVID-19 pandemic [29]. In our search, we found one study that examined adolescents' trust in social media and the results indicated no association between trust in social media and health literacy about COVID-19 [30].

The limited research around trust in social media among adolescents and young adults represents a significant gap in the literature given the extent of social media use in this age range. The predictions of the current study are derived from the Uncertainty Management Framework (UMF) [31], which argues that individuals seek information to suppress uncertainties and stress caused by their health concerns. When information is trustworthy, it is a useful tool that can help us to cope with the stress derived from health concerns, such as concerns over COVID-19. However, when this trust is diminished, this information is less useful as a coping strategy. Brashers notes that coherence is an important component of using information to cope, with incoherent information (such as may be found on social media and exacerbated by the presence of misinformation) leading to uncertainty and stress. One recent study supports this theory, as research revealed trust in media to be a significant mediator in the relation between news exposure and perceived gratitude and satisfaction during the COVID-19 pandemic, such that those who had greater trust reported greater gratitude and satisfaction when exposed to news media [29]. While this work is an important first step, this study used an adult, primarily White, sample from the US collected via MTurk. Thus, additional research is needed that explores these relations with key populations where social media may be influential—namely adolescents and young adults from multiple countries with greater attention to sampling a population with ethnic and racial diversity.

Some social media platforms are perceived as spreading misinformation about COVID-19. Indeed, among adults in the UK and US, Facebook and Twitter are viewed as the most concerning platforms for the spreading of misinformation [26]. Though the short video social media platform, TikTok, does not facilitate the sharing of news information in similar ways to Facebook or Twitter, it became very popular among adolescents and young adults during the COVID-19 pandemic with a 180% increase in users from 15–25 years old after the onset of the COVID-19 pandemic [32]. TikTok developed a reputation for facilitating the spread of misinformation among its users, particularly among its adolescent users [33]. Thus, we believe that it is important to consider each of these social media platforms, and their relationship to well-being, independently given the differences in news information delivery and format of these social media platforms and the reported differing levels of trust in each of them. Indeed, prior research has also demonstrated the importance of considering effects of social media platforms individually as their relations to well-being can be significantly different based on the use of different platforms [34].

## The current study

Given the aforementioned gaps, we investigated three questions. First, what was the association between the frequency of exposure to COVID-19 information on social media and well-being among adolescents and young adults? Given the uncertainty and often troubling news about the COVID-19 pandemic that was frequently shared on social media, we expected that

there would be a negative association between the frequency of encountering COVID-19 information and well-being (Hypothesis 1). Second, what is the association between trust in COVID-19 information and well-being? We expected a positive association between trust in COVID-19 information and well-being (Hypothesis 2). Our third question asks, does trust moderate this relation between frequency of encountering COVID-19 information and well-being among adolescents and young adults? For adolescents and young adults with high and average levels of trust, we expected the association between the frequency of encountering COVID-19 information and well-being would be null or positive. Though some information about the COVID-19 pandemic was likely challenging to a sense of well-being, adolescents and young adults may have been able to find solace and comfort as they trusted the information they were consuming [31]. Alternatively, for adolescents and young adults with low levels of trust, we expected a negative association between the frequency of encountering of COVID-19 information and well-being, as adolescents and young adults may experience significant stress if they are consuming information but do not trust the source of the information (Hypothesis 3) [29].

## Methods

### Participants

The sample consisted of 168 adolescents and young adults (125 girls and 43 boys;  $M_{\text{age}} = 17.4$  years,  $SD = 1.79$ ) from the United Kingdom ( $n = 93$ ) and the United States ( $n = 75$ ). A majority of the participants were between the age of 14 to 18 years old ( $n = 128$ ; 76.2%) and the remaining participants ranged in age from 19 to 23 years old ( $n = 40$ ; 23.8%). Participants reflected the ethnic-racial diversity of their communities, with 38.0% White British or European American, 25.6% South Asian British or Asian American, 10.2% Black British or African American, 1.7% Hispanic or Latino, 9.6% Bi-racial, and 12.5% self-identified as other. Lastly, 2.4% of participants chose not to report their ethnicity. Participants were recruited through informal STEM learning sites (ISLS), where they participated in youth educator programs that involved learning about STEM content and communicating this content to the visitors (for instance, by staffing interactive activities). Participants were drawn from the UK and US as these were two countries that significantly impacted by both COVID-19 pandemic but also misinformation about COVID-19 on social media platforms. In 2020, both the UK and the US were ranked among the top 10 countries most affected by the spread of the COVID-19 [35]. Misinformation plagued social media in both countries but it was particularly prevalent in the US compared to other countries [36].

### Procedure

The study was approved by the Institutional Review Boards at North Carolina State University and the University of Exeter. Families were notified of the study and only potential participants with written informed parental consent (or who consented themselves if they were over 18) participated in the study. Further, all adolescents assented and all young adults consented to participation in a written format before completing the survey. Participants were compensated with a small electronic gift card for the completion of the study survey. All participants completed the survey in May or June of 2020, toward the beginning of the COVID-19 pandemic in the U.K. and U.S. Participants completed the surveys independently on a computer via Qualtrics.

### Measures

**Frequency of exposure to COVID-19 information on social media platforms.** One item was used to assess the frequency of COVID-19 information that participants were exposed to

on a given social media platform. Participants responded to this item for an array of social media platforms, including Facebook, TikTok, and Twitter: How often do you encounter information about COVID-19 from <social media platform>?). Responses were rated on 7-point scales (1 = *Never*; 7 = *Everyday*) for each of the three of the social media platforms assessed in the study. Given the aforementioned potential differences in social media use around various platforms, including Facebook, TikTok, and Twitter, it was important to assess the frequency of exposure to COVID-19 information by each specific social media platform.

**Trust in COVID-19 information on social media.** One item assessed participants' trust in information about COVID-19 that they encountered across various social media platforms (e.g., How much do you trust the information you encounter on social media about COVID-19?). The item was rated on a 7-point scale (1 = *Don't trust at all*; 7 = *Trust completely*).

**Well-being.** Participants completed The Mental Health Continuum–Short Form [37] to assess well-being. The measure is comprised of three subscales that measure emotional well-being, social well-being, and psychological well-being. Emotional well-being was assessed with three items (e.g., During the past month how often did you feel interested in life?); social well-being with five items (e.g., During the past month how often did you feel that you belonged to a community?); and psychological well-being with six items (e.g., During the past month how often did you feel confident to think or express your own ideas?). Adolescents rated agreement on a 6-point scale (1 = *Never*; 6 = *Everyday*), and items were averaged to create a mean score for each of the subscales, with higher scores indicating greater well-being. Measures of emotional, social, and psychological well-being had strong reliability, Cronbach  $\alpha$  values were .88, .78, and .88, respectively. This measure has been assessed and validated with adolescent and adult samples from many different countries including the U.K. and the U.S. (see [38, 39] for reviews). See [S1 Appendix](#) for a full list of items for all measures used in the study.

## Analysis plan

All analyses were conducted in SPSS 27. First, means and bivariate correlations were computed and assessed to determine patterns and associations among key study variables. Then moderation analyses were conducted with the PROCESS Macro Version 3.5 [40]. To assess moderation, a series of multiple regression models were calculated to assess whether trust in COVID-19 information moderated the relation between the frequency of COVID-19 and well-being across three different social media platforms. In the models, the two covariates, Frequency of Encountering COVID-19 information and Trust in COVID-19 information were mean-centered and entered into the models. In addition, an interaction term of these two covariates was calculated and added to the model. If a significant interaction effect was detected, the interaction was probed to more easily interpret the effect of the interaction. Given the relatively wide age range of the sample and the proportional imbalance of gender in our sample, age and gender were included in all models as control variables. Though no differences in the associations were expected to be different on the basis of country of origin (U.S. or U.K.), to be more conservative, we elected to also include country of origin as a control variable in all models.

## Results

### Descriptive statistics

To develop a better understanding of the data, descriptive statistics were computed (See [Table 1](#)). Means for COVID-19 information frequency revealed that participants encountered COVID-19 information on social media platforms at least a few times a week, rather than every day. A one-way ANOVA revealed significant differences in the frequency of COVID-19 information encountered across the social media applications ( $F(2, 316) = 4.34, p = .01, \eta_p^2 =$

**Table 1. Means, sample sizes, and zero-order correlations for key study variables.**

|                                                  | M (SD)      | n   | 1     | 2     | 3     | 4     | 5     | 6     | 7 |
|--------------------------------------------------|-------------|-----|-------|-------|-------|-------|-------|-------|---|
| 1. COVID-19 Information Frequency–Facebook       | 2.87 (2.37) | 164 | -     |       |       |       |       |       |   |
| 2. COVID-19 Information Frequency–TikTok         | 3.16 (2.34) | 162 | .21** | -     |       |       |       |       |   |
| 3. COVID-19 Information Frequency–Twitter        | 3.47 (2.46) | 161 | .31** | .22** | -     |       |       |       |   |
| 4. Trust in COVID-19 Information in Social Media | 2.93 (1.40) | 164 | .02   | .18*  | .25** | -     |       |       |   |
| 5. Emotional Well-being                          | 3.84 (1.20) | 162 | .05   | .11   | -.10  | .04   | -     |       |   |
| 6. Psychological Well-being                      | 3.30 (1.03) | 164 | .13   | .12   | -.04  | .04   | .60** | -     |   |
| 7. Social Well-being                             | 4.20 (1.08) | 164 | .09   | .17*  | -.08  | .23** | .63** | .64** | - |

Note: \*p < .05

\*\*p < .01.

<https://doi.org/10.1371/journal.pone.0282076.t001>

0.03). Pairwise posthoc comparisons with Bonferroni corrections suggested that participants encountered significantly more COVID-19 information on Twitter than on Facebook (3.48 vs. 2.80,  $p = .01$ ).

Among bivariate correlations of the key variables, results indicated that greater frequency of encountering COVID-19 information on one platform of social media was related to greater frequency of encountering COVID-19 information on other social media platforms ( $r$ 's < .21,  $p$ 's < .01). Greater frequency of encountering COVID-19 information on TikTok and Twitter was related to greater trust in COVID-19 information from the respective social media platform ( $r$ 's < .18,  $p$ 's < .01), but not for Facebook ( $r = .02$ ,  $p = .80$ ). Finally, greater trust in social media information about COVID-19 was related to better social well-being ( $r = .23$ ,  $p < .01$ ), but not emotional or psychological well-being ( $r = .04$ ,  $p = .66$ ;  $r = .04$ ,  $p = .64$ , respectively).

### Moderation analyses

In total nine moderation models were estimated to assess the moderating effect of trust of COVID-19 information from social media on the relation between three social media platforms (Facebook, TikTok, and Twitter) and across three different well-being outcomes (emotional well-being, psychological well-being, and social well-being). See Tables 2–4 for all model

**Table 2. Estimates for the main effects and interaction effects of frequency of COVID-19 information on Facebook and trust in COVID-19 information on well-being.**

| Variable                                                                      | B     | (S.E.) | 95% Confidence Interval for B |             | β    |
|-------------------------------------------------------------------------------|-------|--------|-------------------------------|-------------|------|
|                                                                               |       |        | Lower bound                   | Upper bound |      |
| <b>Emotional Well-being</b>                                                   |       |        |                               |             |      |
| Frequency of COVID-19 information on Facebook                                 | .05   | (.04)  | -.02                          | .12         | .07  |
| Trust in COVID-19 information                                                 | -.03  | (.06)  | -.16                          | .09         | -.02 |
| Frequency of COVID-19 information on Facebook × Trust in COVID-19 information | .09** | (.03)  | .04                           | .14         | .26  |
| <b>Psychological Well-being</b>                                               |       |        |                               |             |      |
| Frequency of COVID-19 information on Facebook                                 | .07*  | (.03)  | .00                           | .14         | .14  |
| Trust in COVID-19 information                                                 | -.02  | (.06)  | -.14                          | .09         | -.02 |
| Frequency of COVID-19 information on Facebook × Trust in COVID-19 information | .11** | (.02)  | .06                           | .15         | .35  |
| <b>Social Well-being</b>                                                      |       |        |                               |             |      |
| Frequency of COVID-19 information on Facebook                                 | .06*  | (.03)  | .00                           | .12         | .10  |
| Trust in COVID-19 information                                                 | .12*  | (.05)  | .01                           | .22         | .19  |
| Frequency of COVID-19 information on Facebook × Trust in COVID-19 information | .09** | (.02)  | .05                           | .13         | .29  |

Note. Controls included adolescent gender, age, and country of residence. \*  $p < .05$ . \*\*  $p < .01$

<https://doi.org/10.1371/journal.pone.0282076.t002>

**Table 3. Estimates for the main effects and interaction effects of frequency of COVID-19 information on TikTok and trust in COVID-19 information on well-being.**

| Variable                                                                    | B     | (S.E.) | 95% Confidence Interval for B |             | β   |
|-----------------------------------------------------------------------------|-------|--------|-------------------------------|-------------|-----|
|                                                                             |       |        | Lower bound                   | Upper bound |     |
| <b>Emotional Well-being</b>                                                 |       |        |                               |             |     |
| Frequency of COVID-19 information on TikTok                                 | .08*  | (.04)  | .00                           | .16         | .10 |
| Trust in COVID-19 information                                               | -.02  | (.07)  | -.15                          | .11         | .01 |
| Frequency of COVID-19 information on TikTok × Trust in COVID-19 information | .07** | (.03)  | .02                           | .12         | .23 |
| <b>Psychological Well-being</b>                                             |       |        |                               |             |     |
| Frequency of COVID-19 information on TikTok                                 | .07*  | (.04)  | .00                           | .15         | .11 |
| Trust in COVID-19 information                                               | -.01  | (.06)  | -.13                          | .11         | .00 |
| Frequency of COVID-19 information on TikTok × Trust in COVID-19 information | .07** | (.02)  | .02                           | .11         | .24 |
| <b>Social Well-being</b>                                                    |       |        |                               |             |     |
| Frequency of COVID-19 information on TikTok                                 | .09*  | (.03)  | .02                           | .15         | .13 |
| Trust in COVID-19 information                                               | .13*  | (.06)  | .02                           | .24         | .21 |
| Frequency of COVID-19 information on TikTok × Trust in COVID-19 information | .05*  | (.02)  | .01                           | .09         | .19 |

Note. Controls included adolescent gender, age, and country of residence. \*  $p < .05$ . \*\*  $p < .01$

<https://doi.org/10.1371/journal.pone.0282076.t003>

estimates. Results indicated that frequency of encountering COVID-19 information on TikTok was positively associated with all three well-being outcomes. Frequency of encountering COVID-19 information on Facebook or Twitter was not associated with any of the well-being outcomes. The main effects of trust in COVID-19 information with social well-being outcomes were significant across the three social media platforms. No significant main effects were observed for trust in COVID-19 information and emotional or psychological well-being.

Across the nine moderation models estimated, a significant positive interaction effect was observed, with similar general trends across the models. For illustrative purposes, we have plotted the probed interactions across the three social media platforms and psychological well-being (see Fig 1). For the figures with emotional and social well-being, see S2 Appendix. Conditioned values of trust in COVID-19 information were set to the mean and +/- one standard

**Table 4. Estimates for the main effects and interaction effects of frequency of COVID-19 information on Twitter and trust in COVID-19 information on well-being.**

| Variable                                                                     | B     | (S.E.) | 95% Confidence Interval for B |             | β    |
|------------------------------------------------------------------------------|-------|--------|-------------------------------|-------------|------|
|                                                                              |       |        | Lower bound                   | Upper bound |      |
| <b>Emotional Well-being</b>                                                  |       |        |                               |             |      |
| Frequency of COVID-19 information on Twitter                                 | -.04  | (.04)  | -.11                          | .04         | -.14 |
| Trust in COVID-19 information                                                | .04   | (.07)  | -.09                          | .18         | .09  |
| Frequency of COVID-19 information on Twitter × Trust in COVID-19 information | .07*  | (.03)  | .01                           | .13         | .22  |
| <b>Psychological Well-being</b>                                              |       |        |                               |             |      |
| Frequency of COVID-19 information on Twitter                                 | -.01  | (.04)  | -.08                          | .06         | .04  |
| Trust in COVID-19 information                                                | .02   | (.06)  | -.10                          | .15         | .06  |
| Frequency of COVID-19 information on Twitter × Trust in COVID-19 information | .08** | (.03)  | .03                           | .13         | .03  |
| <b>Social Well-being</b>                                                     |       |        |                               |             |      |
| Frequency of COVID-19 information on Twitter                                 | -.05  | (.03)  | -.12                          | .01         | -.17 |
| Trust in COVID-19 information                                                | .19** | (.06)  | .08                           | .31         | .29  |
| Frequency of COVID-19 information on Twitter × Trust in COVID-19 information | .07** | (.02)  | .03                           | .12         | .24  |

Note. Controls included adolescent gender, age, and country of residence. \*  $p < .05$ . \*\*  $p < .01$

<https://doi.org/10.1371/journal.pone.0282076.t004>



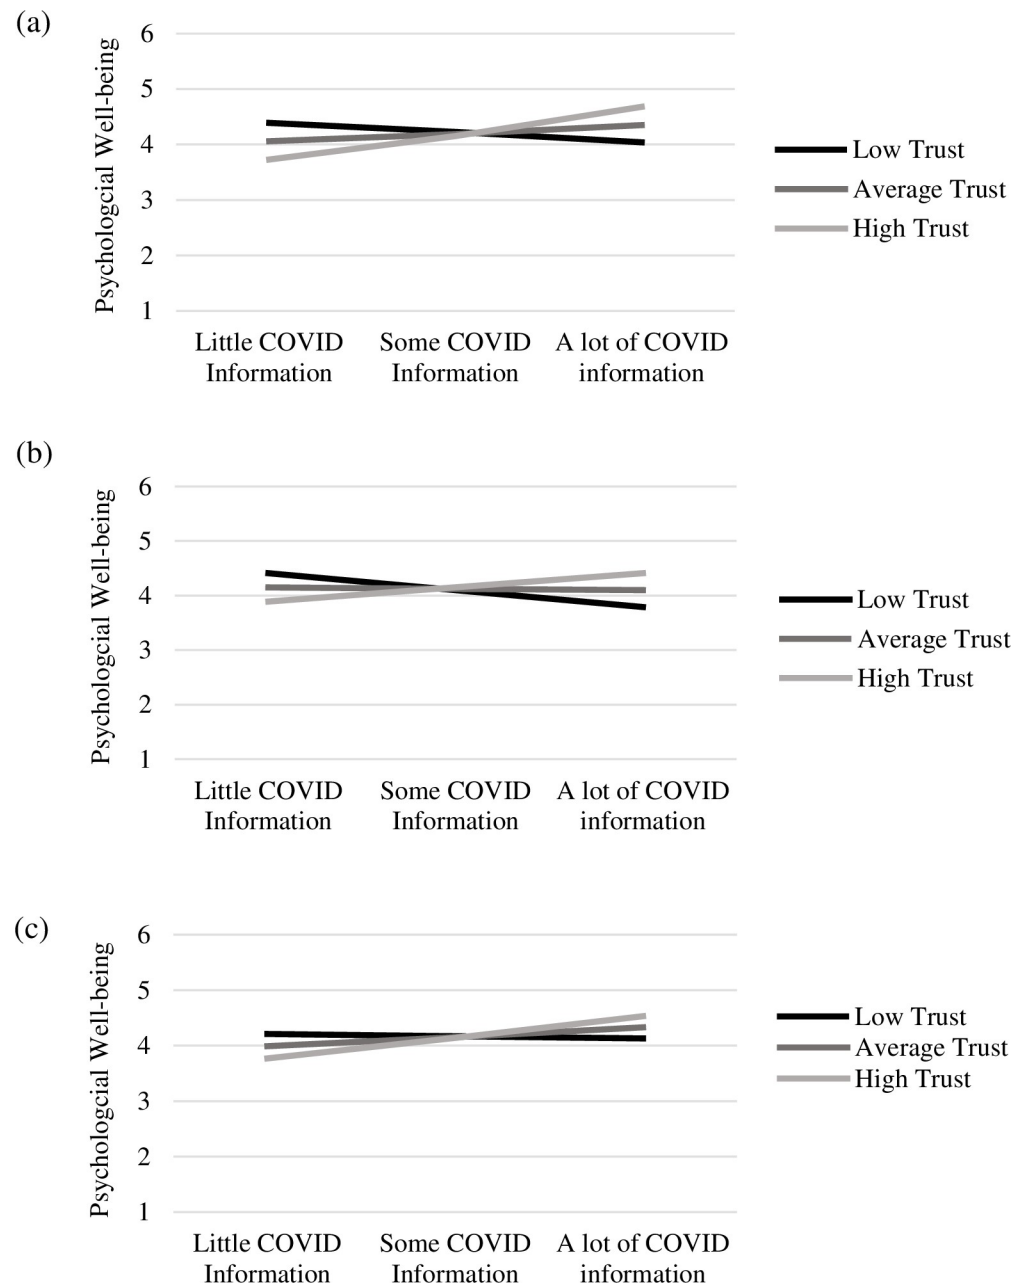

**Fig 1.** Moderation Effect of Trust of COVID-19 Information on the Relation between Frequency of COVID-19 Information on (a) Facebook, (b) TikTok, and (c) Twitter with Psychological Well-being. *Note.* Solid lines indicate a significant effect and dashed lines indicate a non-significant effect.

<https://doi.org/10.1371/journal.pone.0282076.g001>

deviation of the mean. Across all interactions, with the exception of COVID-19 information from Twitter and emotional and social well-being, frequency of encountering COVID-19 information was positively associated with well-being for participants with greater trust in COVID-19 information ( $bs \geq 0.10$ ,  $ps \leq .04$ ). A positive effect for frequency of encountering COVID-19 information with well-being was also observed for adolescents and young adults with average levels of trust across all well-being measures for TikTok ( $bs \geq 0.07$ ,  $ps \leq .045$ ) and for psychological and social well-being for Facebook ( $b = 0.07$ ,  $p = .04$ ;  $b = 0.06$ ,  $p = .04$ ,

respectively). For adolescents and young adults with low trust in COVID-19 information, the frequency of encountering COVID-19 information on Twitter was negatively associated with all well-being outcomes ( $bs \leq -0.13$ ,  $ps \leq .02$ ) and was trending toward a significant association for frequency of encountering COVID-19 information on Facebook and psychological well-being ( $b = -0.08$ ,  $p = .08$ ). No significant effects were observed for adolescents and young adults with low trust between the frequency of encountering COVID-19 information on TikTok and the well-being outcomes ( $bs \leq -0.02$ ,  $ps \geq .71$ ).

## Discussion

Results across the three social media platforms suggested that there was a null or small positive relation between the frequency of COVID-19 information encountered on social media and well-being. However, a more nuanced story unfolded with the inclusion of trust in COVID-19 information as a moderator of this relation. Results indicated that trust in information is a driving factor in the directionality of this relation, such that for adolescents and young adults who trusted information, the positive relation between information encountered and well-being was stronger. Conversely, for adolescents and young adults who did not trust information, the positive relation between information encountered and well-being was null, or in some cases, a negative relation. We discuss the implications of these results and conclude with limitations of the study and promising possibilities for future research on these topics.

### Encountering information on social media and well-being

Contrary to our expectations (Hypothesis 1), we observed positive and null associations between frequency of encountering COVID-19 information and well-being. Given the conflicting and typically troubling news and information around COVID-19 at the time when data were collected (April and May 2020, when cases were becoming increasing widespread for the first time), we reasoned that the more COVID-19 information adolescents encountered the poorer well-being they would report. In the case of Twitter, frequency of encountering COVID-19 information was not associated with well-being and, for Facebook and TikTok, it was positively associated with well-being. It is important to note that the positive associations that were observed had small effect sizes, suggesting that the positive associations observed were small in magnitude. One possible explanation for this positive relation between frequency of encountering COVID-19 information and well-being could be that exposure to more COVID-19 information, albeit likely difficult and depressing, offers a sense of feeling more informed and having a better understanding of the events of the world. Thus, encountering information and feeling better informed could be related to greater positive well-being, compared to those who do not encounter information about relevant and imminent events in the world, like the COVID-19 pandemic. This notion of more information leading to greater well-being is theorized to be the case for individuals who are already experiencing serious illness [41]. We argue that this logic could be extended to individuals who aim to avoid serious illness, like COVID-19. Indeed, individuals do not need to have already contracted COVID-19 to perceive greater well-being because they have more information about COVID-19, whether it be how to avoid it or treat it if contracted.

Our results contribute to the relatively muddled evidence regarding this relation between social media use and well-being and mental health. With mounting evidence indicating an array of positive, negative, and null relations of social media exposure with well-being, it is becoming increasingly clear that assessing the direct relationship between social media exposure/use and well-being may be of limited use and will provide inconsistent results [42, 43]. We argue, along with other scholars, for a more nuanced understanding on this relationship,

which accounts for moderators and mediators, and which therefore provides better understanding of the conditions in which relations do and do not exist and in what direction [22].

### Trust and well-being

Results provided partial support for Hypothesis 2, as greater trust in COVID-19 information seen on social media was associated with social well-being, but was unrelated to emotional or psychological well-being. We expected that enhanced trust in information found in social media would be an indicator of general psychological adjustment and subsequently would be related to greater well-being. In retrospect, perhaps the null association between trust in social media COVID-19 information with emotional and psychological well-being is not unexpected given the recent accounts of mistrust around information gleaned from social media. The positive association between trust in COVID-19 information and social well-being was relatively robust and consistent across the social media platforms. Conceivably, the reason this association was stronger for social well-being, compared to the other dimensions of well-being, is because adolescents and young adults who view social media as trustworthy are probably more likely to engage and be exposed to social media, thus offering a stronger sense of social connectedness and well-being. Indeed, this reasoning is supported by other research examining related trust and well-being measures. For example, researchers found that greater trust in the government to deal with financial and health difficulties during the COVID-19 pandemic was positively associated with satisfaction with life and well-being [44]. Our results contribute to a burgeoning body of research suggesting that greater trust in the institutions of society is related to greater and more positive well-being among individuals, specifically with social well-being [44–46].

### The importance of trust on the implications of social media

To provide a more nuanced understanding of the relation between exposure to COVID-19 information on social media and well-being, we examined the role of trust in COVID-19 information encountered on social media, as a moderator. General trends across the social media platforms supported our hypothesis (Hypothesis 3). The extent to which adolescents trusted COVID-19 information is important as it predicted the directionality of the relation between exposure to COVID-19 information on social media and well-being. Specifically, for adolescents with greater trust, a positive association between exposure to COVID-19 information on social media and well-being was observed. In contrast, for adolescents and young adults with lower trust, the relation between exposure to COVID-19 information on social media and well-being was null or even negative. The negative relation was particularly pronounced when considering the specific social media platforms of Twitter and Facebook (though this negative relation was only trending toward significance for Facebook). Both of these platforms and the companies behind them have developed reputations for spreading misinformation [7, 8]. Perhaps this perception of these social media platforms as not trustworthy and facilitators of spreading misinformation is the reason why the relationship between exposure to COVID-19 information and well-being is negative for adolescents with lower levels of trust. Although lack of trust in COVID-19 information on social media could have negative implications for well-being, research has begun to examine how trust also plays a role in the spreading of misinformation on social media. One study found that greater trust in social media contributed to increasing belief in COVID-19 myths and conspiracies, which then lead to less critical social media posting practices and more spreading of misinformation [47]. Thus, some skepticism in information found on social media can provide benefits on a societal level, however this skepticism could potentially come at the cost of the individuals' well-being.

Finally, our results lend credence to the larger notion that trust is an important concept when considering the effects and influence of most kinds of information encountered on social media for adolescents and young adults [48]. Indeed, research on other forms of information found on social media outside of COVID-19 information (e.g., tourism/travel information or diet information) has also revealed that trust can be a factor in the interpretation and influence of information encountered on social media platforms [49, 50].

### Limitations and future directions

Though this study is characterized by several strengths, it is important to consider the limitations of the study. First, the data that were used for the study were cross-sectional and thus, causation cannot be determined. However, the study provides foundational evidence, and highlights the need for future research to examine further exposure to information on social media and well-being with longitudinal data and explore the importance of trust of information in that relationship. Moreover, some single-item measures were used. We would encourage future research to develop scales related to the use of and trust in social media to enhance our understanding of these factors. Our sample could also be considered a limitation of the study. Adolescents were recruited from extracurricular programming aimed at enhancing interest in science, technology, engineering, and mathematics, thus these youth could have greater awareness of science literacy and misinformation around the science of COVID-19, thereby exacerbating the negative relation between exposure to COVID-19 information and well-being. Also, although the ethnic-racial diversity of the sample did reflect that of the two countries that adolescents were recruited from, there was an imbalance of gender in the study, where girls were overrepresented. Though we did control for the effect of gender in our study, future studies should recruit more representative samples to ensure the generalizability of these findings.

Future research on this topic is encouraged to consider other factors that may also moderate this relation, in addition to assessing trust as a moderator. Inclusion and assessment of the multiple moderators will ensure the robustness of the effects and increase the generalizability of these findings. An important consideration for future research could be to better understand these relations within individuals who actively seek out information and want to learn more versus individuals who actively avoid information. Indeed, one might expect negative relation between information encountered on social media and well-being individuals who work to actively avoid information but a positive relation for those who actively search for information. Finally, future research in this area should consider the extent which individuals perceive misinformation to be common to a social media platform. Though an individual may have trust in information shared on social media broadly, the reputation for or perception of misinformation for specific platforms could also impact the relation between information encountered on social media and well-being. In addition to the assessment of moderating factors of the relation between exposure to COVID-19 information on social media and well-being, we encourage future researchers to also consider mediating factors as well, to help better understand what could be explaining this relation. For example, interest in understanding COVID-19 would likely be an important mediator impacting this relation.

### Conclusions

Since the inception of social media in our society, we have wondered about its effect on our well-being, particularly among adolescents, some of the most frequent users of social media. Yet, despite over a decade of research, there is little consensus as to whether or not social media is actually detrimental or enhances our well-being. Given this lack of clarity, we aimed

to provide a clearer understanding of this relation by examining it through a lens of trust as it relates to encountering COVID-19 information early in the COVID-19 pandemic. Our results provided evidence that trust is a critical factor when considering the relation between exposure to social media and well-being among adolescents and young adults. Though our results do suggest that having enhanced trust in the information adolescents are consuming can be beneficial for their well-being, we caution and emphasize the importance of strong skills, like critical thinking, analysis, and problem solving, in deciphering credible sources of information. We encourage schools and universities to actively enhance these skills with adolescents and young adults, especially on social media where they are likely to encounter and engage with information, so that the information that is gleaned is accurate but also perceived as trustworthy.

## Supporting information

**S1 Appendix. Individual items for primary study measures.**  
(DOCX)

**S2 Appendix. Moderation Effect of Trust of COVID-19 Information on the Relation between Frequency of COVID-19 Information on (a) Facebook, (b) TikTok, and (c) Twitter with Emotional Well-being.**  
(DOCX)

## Acknowledgments

The authors would like to thank our practitioner partners and the youth who participated in the study. Correspondence should be addressed to Adam J. Hoffman in the Department of Psychology, Cornell University, T229 Martha Van Rensselaer Hall, 116 Reservoir Ave, Ithaca, New York, USA, 14850.

## Author Contributions

**Conceptualization:** Adam J. Hoffman, Fidelia Law, Adam Rutland, Adam Hartstone-Rose, Mark Winterbottom, Kelly Lynn Mulvey.

**Data curation:** Adam J. Hoffman, Luke McGuire, Channing J. Mathews, Adam Rutland, Adam Hartstone-Rose, Mark Winterbottom, Kelly Lynn Mulvey.

**Formal analysis:** Adam J. Hoffman.

**Funding acquisition:** Adam Rutland, Adam Hartstone-Rose, Mark Winterbottom, Kelly Lynn Mulvey.

**Methodology:** Adam Rutland.

**Project administration:** Adam J. Hoffman, Luke McGuire, Channing J. Mathews.

**Software:** Adam J. Hoffman.

**Writing – original draft:** Adam J. Hoffman, Luke McGuire, Channing J. Mathews, Angelina Joy, Fidelia Law, Marc Drews, Adam Rutland, Adam Hartstone-Rose, Mark Winterbottom, Kelly Lynn Mulvey.

## References

1. Mitchell A. & Liedke J. (2021, Aug. 24). *About four-in-ten Americans say social media is an important way of following COVID-19 vaccine news*. Pew Research Center. <https://www.pewresearch.org/fact->

[tank/2021/08/24/about-four-in-ten-americans-say-social-media-is-an-important-way-of-following-covid-19-vaccine-news/](https://doi.org/10.1371/journal.pone.0282076.tank/2021/08/24/about-four-in-ten-americans-say-social-media-is-an-important-way-of-following-covid-19-vaccine-news/)

2. Tandoc E. C. Jr, & Lee J. C. B. (2020). When viruses and misinformation spread: How young Singaporeans navigated uncertainty in the early stages of the COVID-19 outbreak. *New Media & Society*, 1461444820968212. <https://doi.org/10.1177/1461444820968212>
3. Ytre-Arne B., & Moe H. (2021). Doomscrolling, monitoring and avoiding: News use in COVID-19 pandemic lockdown. *Journalism Studies*, 1–17. <https://doi.org/10.1080/1461670X.2021.1952475>
4. Wardle C., & Singerman E. (2021). Too little, too late: Social media companies' failure to tackle vaccine misinformation poses a real threat. *bmj*, 372. <https://doi.org/10.1136/bmj.n26> PMID: 33478950
5. Suarez-Lledo V., & Alvarez-Galvez J. (2021). Prevalence of health misinformation on social media: Systematic review. *Journal of Medical Internet Research*, 23, e17187. <https://doi.org/10.2196/17187> PMID: 33470931
6. Edelman trust barometer. (2021). <https://www.edelman.com/trust/2021-trust-barometer>
7. Madden M., Lenhart A., & Fontaine C. (2017, Feb.) *How youth navigate the news landscape*. The Knight Foundation & Data and Society. [https://knightfoundation.org/wp-content/uploads/2020/03/Youth\\_News.pdf](https://knightfoundation.org/wp-content/uploads/2020/03/Youth_News.pdf)
8. Pew Research Center (2021). Social media use in 2021. <https://www.pewresearch.org/internet/2021/04/07/social-media-use-in-2021/>
9. Wells G., Horwitz J., & Seetharaman D., (2021, Sept. 14). *Facebook knows Instagram is toxic for teen girls, company documents show*. The Wall Street Journal. [https://www.wsj.com/articles/facebook-knows-instagram-is-toxic-for-teen-girls-company-documents-show-11631620739?mod=hp\\_lead\\_pos7&mod=article\\_inline](https://www.wsj.com/articles/facebook-knows-instagram-is-toxic-for-teen-girls-company-documents-show-11631620739?mod=hp_lead_pos7&mod=article_inline)
10. DataReportal. (2021). Digital 2021: The United Kingdom. <https://datareportal.com/reports/digital-2021-united-kingdom>
11. Pew Research Center (2018). Teens, social media, and technology 2018. <https://www.pewresearch.org/internet/2018/05/31/teens-social-media-technology-2018/>
12. Ofcom (2021). Children and parents: Media use and attitudes report 2020/21. [https://www.ofcom.org.uk/\\_data/assets/pdf\\_file/0025/217825/children-and-parents-media-use-and-attitudes-report-2020-21.pdf](https://www.ofcom.org.uk/_data/assets/pdf_file/0025/217825/children-and-parents-media-use-and-attitudes-report-2020-21.pdf)
13. Weinstein E. (2018). The social media see-saw: Positive and negative influences on adolescents' affective well-being. *New Media & Society*, 20, 3597–3623. <https://doi.org/10.1177/1461444818755634>
14. O'Reilly M., Dogra N., Whiteman N., Hughes J., Eruyar S., & Reilly P. (2018). Is social media bad for mental health and wellbeing? Exploring the perspectives of adolescents. *Clinical Child Psychology and Psychiatry*, 23, 601–613. <https://doi.org/10.1177/1359104518775154> PMID: 29781314
15. Coyne S. M., Rogers A. A., Zurcher J. D., Stockdale L., & Booth M. (2020). Does time spent using social media impact mental health?: An eight year longitudinal study. *Computers in Human Behavior*, 104, 106160. <https://doi.org/10.1016/j.chb.2019.106160>
16. Ostic D., Qalati S. A., Barbosa B., Shah S. M. M., Galvan Vela E., Herzallah A. M., et al., (2021). Effects of Social Media Use on Psychological Well-Being: A Mediated Model. *Frontiers in Psychology*, 12, 2381. <https://doi.org/10.3389/fpsyg.2021.678766> PMID: 34234717
17. Booker C. L., Kelly Y. J., & Sacker A. (2018). Gender differences in the associations between age trends of social media interaction and well-being among 10–15 year olds in the UK. *BMC Public Health*, 18, 1–12. <https://doi.org/10.1186/s12889-018-5220-4>
18. Price M., Legrand A. C., Brier Z. M. F., van Stolk-Cooke K., Peck K., Dodds P. S., et al., (2021, March 30). Doomscrolling during COVID-19: The negative association between daily social and traditional media consumption and mental health symptoms during the COVID-19 pandemic. <https://doi.org/10.31234/osf.io/s2nfg>
19. Elbarazi I., Saddik B., Grivna M., Aziz F., ElSORI D., Stip E., et al., (2022). The impact of the COVID-19 “Infodemic” on well-being: A cross-sectional study. *Journal of Multidisciplinary Healthcare*, 15, 289–307. <https://doi.org/10.2147/JMDH.S346930> PMID: 35228802
20. Jankowski P. J., Sandage S. J., Bell C. A., Davis D. E., Porter E., Jessen M., et al., (2020). Virtue, flourishing, and positive psychology in psychotherapy: An overview and research prospectus. *Psychotherapy*, 57(3), 291–309. <https://doi.org/10.1037/pst0000285> PMID: 31985238
21. Keyes C. L. M. (1998). Social well-being. *Social psychology quarterly*, 121–140. <https://doi.org/10.2307/2787065>
22. Beyens I., Pouwels J. L., van Driel I. I., Keijsers L., & Valkenburg P. M., (2020). The effect of social media on well-being differs from adolescent to adolescent. *Scientific Reports*, 10, 10763. <https://doi.org/10.1038/s41598-020-67727-7> PMID: 32612108

23. Wood M. A., Bukowski W. M., & Lis E. (2016). The digital self: How social media serves as a setting that shapes youth's emotional experiences. *Adolescent Research Review*, 1(2), 163–173. <https://doi.org/10.1007/s40894-015-0014-8>
24. Goodyear V. A., Armour K. M., & Wood H. (2018). The impact of social media on young people's health and wellbeing: Evidence, guidelines and actions. Birmingham, UK: University of Birmingham. [http://epapers.bham.ac.uk/3070/1/The\\_Impact\\_of\\_Social\\_Media\\_on\\_Young\\_People%E2%80%99s\\_Health\\_and\\_Wellbeing\\_%28FINAL\\_15TH\\_JAN%29.pdf](http://epapers.bham.ac.uk/3070/1/The_Impact_of_Social_Media_on_Young_People%E2%80%99s_Health_and_Wellbeing_%28FINAL_15TH_JAN%29.pdf)
25. Pan American Health Organization & World Health Organization (2020). Understanding the infodemic and misinformation in the fight against COVID-19. [https://iris.paho.org/bitstream/handle/10665.2/52052/Factsheet-infodemic\\_eng.pdf?sequence=16](https://iris.paho.org/bitstream/handle/10665.2/52052/Factsheet-infodemic_eng.pdf?sequence=16)
26. Reuters Institute. (2021) Reuters Institute Digital News Report 2021, 10th Edition. [https://reutersinstitute.politics.ox.ac.uk/sites/default/files/2021-06/Digital\\_News\\_Report\\_2021\\_FINAL.pdf](https://reutersinstitute.politics.ox.ac.uk/sites/default/files/2021-06/Digital_News_Report_2021_FINAL.pdf)
27. Xiao X., Borah P., & Su Y. (2021). The dangers of blind trust: Examining the interplay among social media news use, misinformation identification, and news trust on conspiracy beliefs. *Public Understanding of Science*, 0963662521998025. <https://doi.org/10.1177/0963662521998025> PMID: 33663279
28. Lee S. (2022). Subjective well-being and mental health during the pandemic outbreak: exploring the role of institutional trust. *Research on Aging*, 0164027520975145. <https://doi.org/10.1177/0164027520975145> PMID: 33234059
29. Jain P. (2021). The COVID-19 Pandemic and positive psychology: The role of news and trust in news on mental health and well-being. *Journal of Health Communication*, 26, 317–327. <https://doi.org/10.1080/10810730.2021.1946219> PMID: 34185615
30. Mathews C. J., McGuire L., Joy A., Law F., Winterbottom M., Rutland A., et al., (2021). Assessing adolescents' critical health literacy: How is trust in government leadership associated with knowledge of COVID-19? *PloS one*, 16(11), e0259523. <https://doi.org/10.1371/journal.pone.0259523> PMID: 34818322
31. Brashers D. E. (2001). Communication and uncertainty management. *Journal of Communication*, 51, 477–497. <https://doi.org/10.1111/j.1460-2466.2001.tb02892.x>
32. Statista Research Department. (2021, Feb 21) *Share of individuals using TikTok during the coronavirus outbreak in the United States in 2020*. <https://www.statista.com/statistics/1207831/tiktok-usage-among-young-adults-during-covid-19-usa/>
33. Cardier, A., & Goldin, M. (2021, Sept 22). *TikTok feeds COVID misinformation to kids minutes after they sign up*. Newsweek. <https://www.newsweek.com/tiktok-feeds-covid-misinformation-kids-minutes-after-they-sign-1631390>
34. Wirtz D., Tucker A., Briggs C., & Schoemann A. M. (2021). How and why social media affect subjective well-being: Multi-site use and social comparison as predictors of change across time. *Journal of Happiness Studies*, 22(4), 1673–1691. <https://doi.org/10.1007/s10902-020-00291-z>
35. World Health Organization. (2020). *WHO Coronavirus (COVID-19) Dashboard*. World Health Organization. Retrieved October 11, 2022, from <https://covid19.who.int/table>
36. Al-Zaman M. S. (2021). Prevalence and source analysis of COVID-19 misinformation in 138 countries. *IFLA Journal*, 48(1), 189–204. <https://doi.org/10.1177/03400352211041135>
37. Keyes C. L. (2006). Mental health in adolescence: Is America's youth flourishing? *American Journal of Orthopsychiatry*, 76, 395–402. <https://doi.org/10.1037/0002-9432.76.3.395> PMID: 16981819
38. Iasiello M., van Agteren J., Schotanus-Dijkstra M., Lo L., Fassnacht D. B., & Westerhof G. J. (2022). Assessing mental wellbeing using the Mental Health Continuum—Short Form: A systematic review and meta-analytic structural equation modelling. *Clinical Psychology: Science and Practice*, 29(4), 442–456. <https://doi.org/10.1037/cps0000074>
39. Źemojtel-Piotrowska M., Piotrowski J. P., Osin E. N., Ciecuch J., Adams B. G., Ardi R., et al., (2018). The mental health continuum-short form: The structure and application for cross-cultural studies—A 38 nation study. *Journal of Clinical Psychology*, 74(6), 1034–1052. <https://doi.org/10.1002/jclp.22570> PMID: 29380877
40. Hayes A. F. (2017). Introduction to mediation, moderation, and conditional process analysis: A regression-based approach. New York, NY: Guilford Press.
41. Folkman S., & Greer S. (2000). Promoting psychological well-being in the face of serious illness: when theory, research and practice inform each other. *Psycho-Oncology*, 9, 11–19. [https://doi.org/10.1002/\(SICI\)1099-1611\(200001/02\)9:1<11::AID-PON424>3.0.CO;2-Z](https://doi.org/10.1002/(SICI)1099-1611(200001/02)9:1<11::AID-PON424>3.0.CO;2-Z) PMID: 10668055
42. George M. J., Jensen M. R., Russell M. A., Gassman-Pines A., Copeland W. E., Hoyle R. H., et al., (2020). Young adolescents' digital technology use, perceived impairments, and well-being in a representative sample. *The Journal of Pediatrics*, 219, 180–187. <https://doi.org/10.1016/j.jpeds.2019.12.002> PMID: 32057438

43. Vannucci A., & Ohannessian C. M. (2019). Social media use subgroups differentially predict psychosocial well-being during early adolescence. *Journal of Youth and Adolescence*, 48(8), 1469–1493. <https://doi.org/10.1007/s10964-019-01060-9> PMID: 31256313
44. Barrafreem K., Tinghög G., & Västfjäll D. (2021). Trust in the government increases financial well-being and general well-being during COVID-19. *Journal of Behavioral and Experimental Finance*, 31, 100514. <https://doi.org/10.1016/j.jbef.2021.100514> PMID: 34545323
45. Mazumder S. (2020). How important is social trust during the COVID-19 crisis period? Evidence from the Fed announcements. *Journal of Behavioral and Experimental Finance*, 28, 100387. <https://doi.org/10.1016/j.jbef.2020.100387> PMID: 32868990
46. Zak P. J., & Knack S. (2001). Trust and growth. *The Economic Journal*, 111(470), 295–321. <https://doi.org/10.1111/1468-0297.00609>
47. Melki J., Tamim H., Hadid D., Makki M., El Amine J., & Hitti E. (2021). Mitigating infodemics: The relationship between news exposure and trust and belief in COVID-19 fake news and social media spreading. *PLoS ONE*, 16, e0252830. <https://doi.org/10.1371/journal.pone.0252830> PMID: 34086813
48. Gandhi, M. (2021). *Do Americans trust tech giants?* SEO Research. <https://www.seo clarity.net/blog/americans-and-trusting-tech>
49. Pop R. A., Săplăcan Z., Dabija D. C., & Alt M. A. (2022). The impact of social media influencers on travel decisions: The role of trust in consumer decision journey. *Current Issues in Tourism*, 25(5), 823–843. <https://doi.org/10.1080/13683500.2021.1895729>
50. Sina E., Boakye D., Christianson L., Ahrens W., & Hebestreit A. (2022). Social Media and Children's and Adolescents' Diets: A Systematic Review of the Underlying Social and Physiological Mechanisms. *Advances in Nutrition*, 13(3), 913–937. <https://doi.org/10.1093/advances/nmac018> PMID: 35218190
